# Supplementary material for: Comprehensive Analysis and Expression Profiling of PIN, AUX/LAX, and ABCB Auxin Transporter Gene Families in Solanum tuberosum under Phytohormone Stimuli and Abiotic Stresses
Source: Research Square preprint supplement (doi:10.21203/rs.3.rs-112829/v1), 2020-11-24
Supplement: Supplementary file 1 [file b63e2f34c450a85834457810.xlsx]

## Sheet: Sheet1
Table S9. Motif sites of cis-elements in the promoters of auxin transporter genes.
Motifs	AuxRE				ABRE	MYBR	MYCR	DRE	CE1	W-box		GCC box	HB	EE
Core sequences	TGTCTC	TGACG	ACTCAT	MACCWAMC	ACGTG	CTAACCA	CACATG	TACCGACAT	TGCCACCGG	TTGAC	TGACT	GCCGCC	CAATNATTG	AAAATATCT
PLACE entries	S000270	S000024	S000450	S000167	S000414	S000175	S000174	S000152	S000014	S000390	S000442	S000430	S000371	S000385
StLAX1		328-；448-；	845+；1154+；		1098+；					449-；461+；485-；575-；744+；1062-；1262-；1535-；	184-；484-；574-；1739-；
StLAX2	1260+；1408-；1970+；	91+；					180+；			204-；942+；1020-；1070+；1084+；1156-；1237-；1586-；	203-；490-；664-；1042-；1071+；1085+；1155-；1236-；	1577+；
StLAX3	1760-；1819-；		109-；	541+；	1522-；		896-；			1225+；1396-；	1226+；1922+；
StLAX4		239-；					381+；782+；1114+；			64-；113-；240-；661-；1011-；	660-；1069+；1327+；	1461+；
StLAX5	1245+；				656+；		1190+；1192-；			58-；65+；1281-；1296+；1432-；1603+；1646+；	376+；531-；659+；1280-；1797+；2013-；		1383-；1383+；	143-；
StPIN1	657+；			489+；793+；869+；	752-；		1089+；1908+；			282+；360+；381-；619+；701+；720-；1115+；1251+；1480-；	620+；1252+；1314-；1584+；
StPIN2					1671+；1684-；		1556+；			33+；323+；366-；510+；659-；777-；883+；1099-；	34+；650-；747+；776-；1098-；
StPIN3		1573+；					922-；			1169-；1572+；
StPIN4		1100+；	675+；							1099+；1243+；1999+；	1525-；1561+；			1052-；
StPIN5		325-；	265+；1257-；	1873+；	106-；323-；538-；					336-；359+；1125+；1173+；1236-；1742-；	1126+；1174+；1235-；1671+；
StPIN6			321-；1399-；				620+；			528-；578+；1302-；1393-；1403-；1510-；1517+；1706-；	567-；579+；1301-；1402-；1509-；1518+；1705-；			678-；
StPIN7	557-；1700+；		39-；821-；1798-；	1286+；	1324+；					988-；1056+；	21+；42-；1057+；
StPIN8	1534-；			1955+；			1604+；			471-；1205+；	128+；470-；1249-；1257-；1893-；	867-；
StPIN9		1163+；			953-；1077+；		1841-；1934-；			171+；188+；1095-；1162+；	475+；783+；1070+；1094-；
StPIN10		1489-；	62-；996-；	1128+；1965+；	1703-；					16+；189-；690-；1388+；1490-；1775+；	188-；379+；689-；1023-；1389+；1776+；
StABCB1		195-；			142-；143+；155-；		544-；			196-；549-；614-；835-；960-；	959-；1718+；
StABCB2	1730+；				25+；		1280-；			527+；1024-；1042+；1078-；1164+；1781+；1938+；1969-；	455-；528+；545-；1023-；1043+；1077-；1408-；1782+；
StABCB3	427+；	105-；1166+；1201-；	1004+；1912-；		845+；973+；					269-；1039-；1237-；1603+；1947-；	164-；268-；657-；1236-；1604+；
StABCB4			1350-；							1873+；1899+；				852+；
StABCB5			1618-；1880+；		698-；801+；		818-；			44+；49+；787+；	45+；1381-；
StABCB6	670-；	743-；	269+；1214-；1471+；				528-；			73-；149+；306-；378+；422-；472+；795+；	203+；473+；1238-；1372-；
StABCB7		1448+；			104-；243-；547-；869-；1479-；		281-；			378+；580-；882+；1354+；1490-；1576-；1724-；1764-；1807+；	379+；457+；473+；753-；1083-；1095+；1227-；1355+；1489-；1723-；1730-；1785-；
StABCB8	1439-；				118-；119+；1584+；	1797-；	1646-；			397+；535-；874+；925+；	21+；875+；926+；1375+；1984+；	295+；570-；
StABCB9	1417-；	1431+；1764-；			473-；1712-；1750+；1835-；		557+；933-；			111+；621-；996-；1642-；1765-；	490+；1655+；			1122-；
StABCB10		380+；1269+；	406+；		595-；596+；646-；		37-；797+；967-；1427-；			226+；347-；379+；488+；863-；1225-；1268+；	254+；346-；1096+；1828-；			997-；
StABCB11		422-；635+；1022-；1583+；	1811+；		208+；420-；1991+；		445+；1579+；1967+；			423-；634+；1013-；1061-；1205-；1699+；1802+；	1012-；1060-；1646+；		1063+；
StABCB12	936-；1181+；		1422-；		1051+；1636-；		496-；			217-；223+；362+；487-；1016+；1494-；	228-；358+；472-；486-；1017+；
StABCB13	43-；	1379+；	832-；878-；891+；	62-；67-；	342-；1381+；		743+；745-；			1328+；1743+；1852+；	881-；1646+；
StABCB14	655-；1029-；1525+；	481+；			221-；222+；438-；613-；614+；		659+；			754+；974-；1001-；1492+；	1493+；
StABCB15	1775-；	49+；189-；577+；			459-；		828+；			48+；190-；669+；984-；1618-；	113+；456-；520-；670+；937+；1566+；
StABCB16			435+；		1392-；1500-；					128-；294+；424-；683+；1049-；1229-；1327-；1824-；	423-；1048-；1823-；1847+；
StABCB17		329+；850+；955+；1277-；	267-；479-；		613-；852+；957+；996+；1706-；1854+；					49+；106-；328+；609+；810+；1239-；1422+；	270-；1238-；1286-；1967+；
StABCB18	1771-；	1493+；	435-；1329-；		38+；	205+；	1148+；1489-；			47-；52+；1659-；1668-；1825-；	1658-；
StABCB19			278+；390+；472+；666-；928+；	1065+；	1517-；					1561+；	267-；1562+；
StABCB20		1063+；1135+；			253+；637+；841-；842+；861-；862+；1636+；		1197+；			572+；1134+；1564-；1712+；	270+；1201+；		659-；659+；685-；685+；
StABCB21		1652+；	1273+；		1623-；					389+；1033+；	1749+；			778+；
StABCB22		132+；368+；513+；568+；624+；679+；735+；790+；846+；901+；957+；1013+；1056+；1147+；1180+；1223+；1266+；		57-；	134+；		126+；128-；1105+；1316+；			275+；367+；456+；512+；567+；623+；678+；734+；789+；845+；900+；956+；1012+；1037+；1055+；1179+；1222+；1247+；1265+；1823+；1831-；1934+；	276+；457+；1205+；1830-；
